# Supplementary material
Source: PubMed Central journal article supplement (PMC3060252)
Supplement: 1014872108_pnas.1014872108_SI.pdf [file 1014872108_pnas.1014872108_SI.pdf]

# Supplemental Information

Dey et al. 10.1073/pnas.1014872108

## SI Methods

**NMR Methods.** The bacterial expression vector encoding residues 3 to 175 of *Saccharomyces cerevisiae* eIF2 $\alpha$  was described previously (1). Isotopically labeled WT eIF2 $\alpha$ , eIF2 $\alpha$ -L50S, and eIF2 $\alpha$ -I62G were obtained from 2-L cultures in minimal M9 media containing [U-98%] 1.0 g/L  $^{15}\text{N}$ -ammonium chloride as the sole source of nitrogen, or [U-98%] 1.0 g/L  $^{15}\text{N}$ -ammonium chloride and [U-99%] 2.0 g/L  $^{13}\text{C}$ -glucose as nitrogen and carbon sources, respectively. All eIF2 $\alpha$  proteins were purified as described previously (1) with the final size exclusion chromatography step using a buffer solution containing 20 mM sodium phosphate, pH = 7.0 and 350 mM  $\text{Na}_2\text{SO}_4$ , 10 mM DTT, 0.5 mM EDTA, and 0.5 mM benzamidine. Proteins were concentrated to 0.5–0.9 mM in 0.5 mL for NMR analysis, and 10% of  $\text{D}_2\text{O}$  was added to each sample for spectrometer field lock. Backbone assignments of all nonproline residues (except Lys162) of WT protein were derived from a suite of triple-resonance spectra (2) and a 3D  $^{15}\text{N}$ -edited NOESY (3), recorded at 25 °C on a 500 MHz spectrometer (room temperature probe) using an

$^{15}\text{N}/^{13}\text{C}$ -labeled sample. Assignments of two mutant proteins were obtained by direct transfer from the WT protein for the majority of residues; sets of HNCA, HNCO and HN(CA)CO experiments on  $^{15}\text{N}/^{13}\text{C}$ -labeled samples were sufficient to derive assignments for the Ser51 loop and to confirm the accuracy of assignments over the entire sequence of mutant proteins. The TALOS+ software package was used to convert backbone chemical shifts to order parameter values using the random coil index approach (4, 5). A transverse relaxation optimized spectroscopy (TROSY) version of  $\{^1\text{H}\} - ^{15}\text{N}$  NOE experiment was recorded on  $^{15}\text{N}$ -only labeled samples at 25 °C on an 800-MHz spectrometer (room temperature probe); 100 points were collected in the indirect dimension (2240-Hz spectral window), 24 transients per point; recycle delays were 9 s of recovery followed by 6 s of saturation of amide protons or 15 s of recovery (no saturation) in the reference spectrum. Spectra were processed and peak intensities measured using the nmrPipe software package (6).

1. Dar AC, Dever TE, Sicheri F (2005) Higher-order substrate recognition of eIF2 $\alpha$  by the RNA-dependent protein kinase PKR. *Cell* 122:887–900.
2. Sattler M, Schleucher J, Griesinger C (1999) Heteronuclear multidimensional NMR experiments for the structure determination of proteins in solution employing pulsed field gradients. *Prog Nucl Mag Reson Spectrosc* 34:93–158.
3. Zhang O, Kay LE, Olivier JP, Forman-Kay JD (1994) Backbone  $^1\text{H}$  and  $^{15}\text{N}$  resonance assignments of the N-terminal SH3 domain of drk in folded and unfolded states using enhanced-sensitivity pulsed field gradient NMR techniques. *J Biomol NMR* 4:845–858.
4. Shen Y, Delaglio F, Cornilescu G, Bax A (2009) TALOS+: A hybrid method for predicting protein backbone torsion angles from NMR chemical shifts. *J Biomol NMR* 44:213–223.
5. Berjanskii MV, Wishart DS (2005) A simple method to predict protein flexibility using secondary chemical shifts. *J Am Chem Soc* 127:14970–14971.
6. Delaglio F, et al. (1995) NMRPipe: a multidimensional spectral processing system based on UNIX pipes. *J Biomol NMR* 6:277–293.

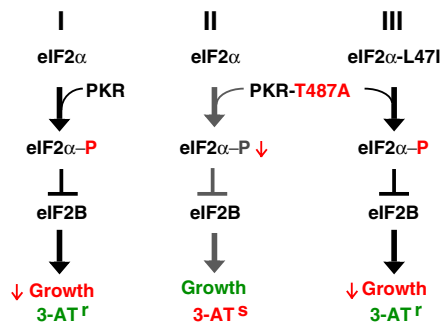

**Fig. S1.** Schematics of PKR growth phenotypes in yeast. (Scheme I) Phosphorylation of WT eIF2 $\alpha$  by PKR results in eIF2B inhibition, poor yeast growth, and induction of *GCN4* expression conferring a 3-AT-resistant phenotype. (Scheme II) Impaired phosphorylation of eIF2 $\alpha$  by PKR-T487A reverses the growth phenotypes. (Scheme III) The eIF2 $\alpha$ -L471 mutation restores phosphorylation by PKR-T487A and the WT growth phenotypes.



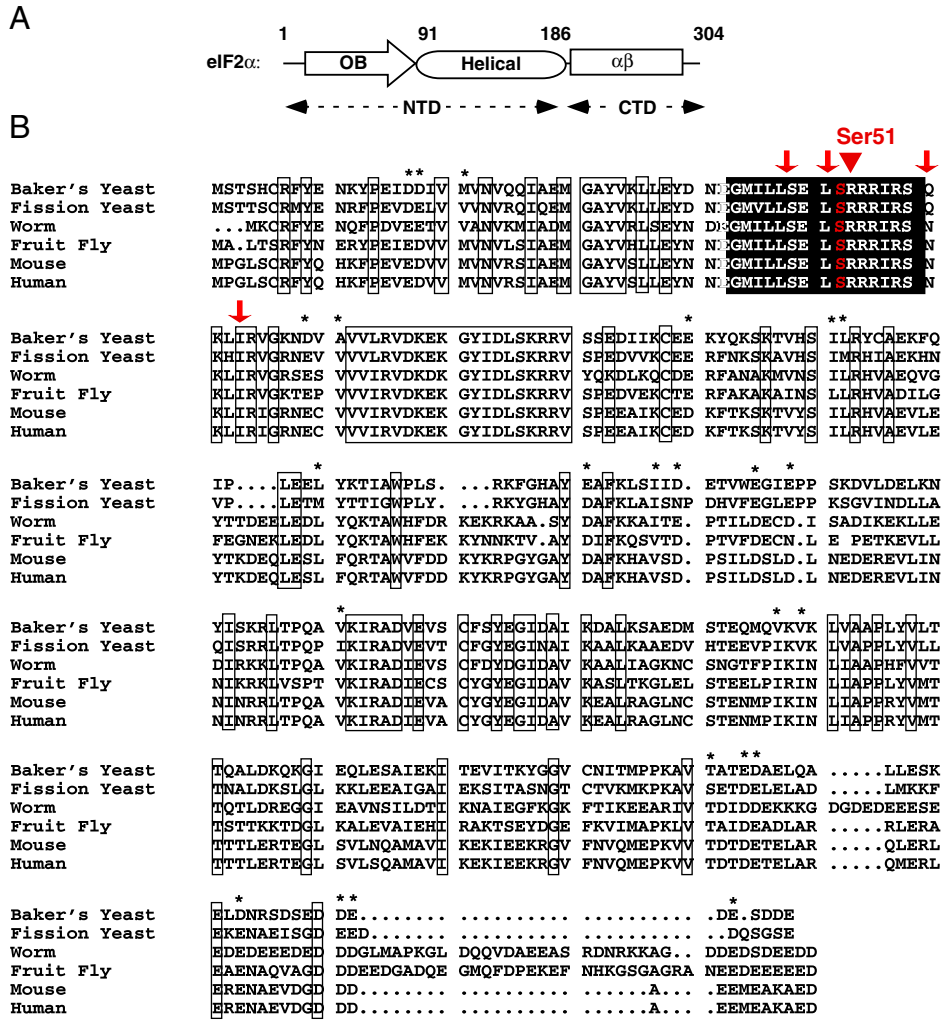

**Fig. S3.** Conservation of eIF2 $\alpha$  primary and tertiary structures. (A) Schematic of eIF2 $\alpha$  structure depicting the N-terminal domain (NTD) composed of an OB-fold and helical domain and the C-terminal domain (CTD) containing an  $\alpha\beta$  fold. (B) Multiple amino acid sequence alignment of eIF2 $\alpha$  from *Saccharomyces cerevisiae* (baker's yeast); *Schizosaccharomyces pombe* (fission yeast), *Caenorhabditis elegans* (worm); *Drosophila melanogaster* (fly); *Mus musculus*; and *Homo sapiens* (human). Identical residues are boxed. Perfect sequence conservation flanking Ser51 (red) is shown in reverse type. Residues participating in the hydrophobic network surrounding Ser51 are marked by red arrows.





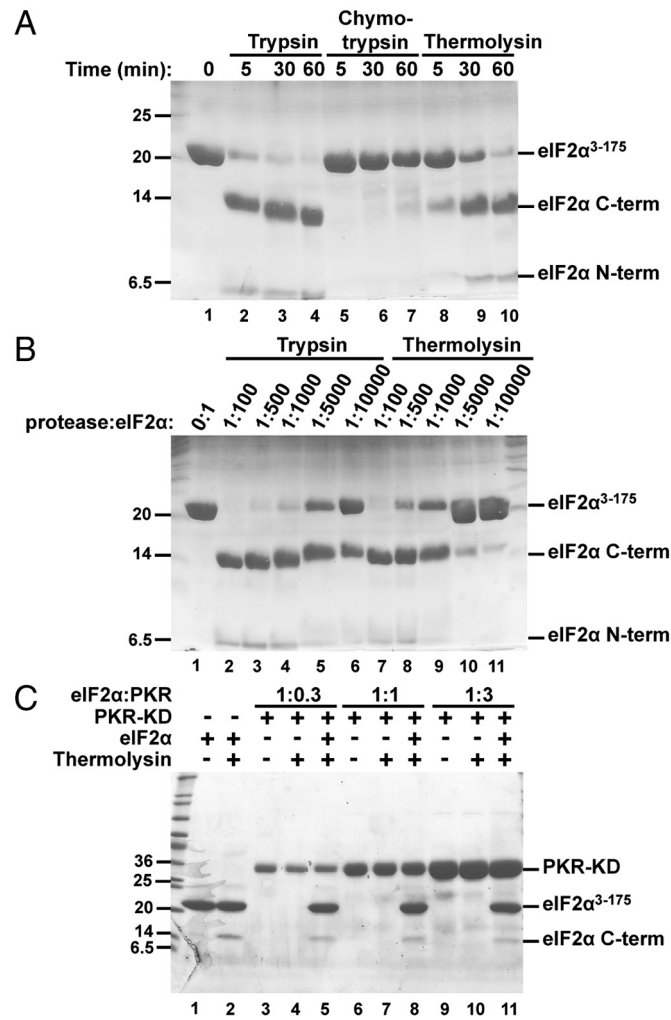

**Fig. 56.** Protease sensitivity of the Ser51 loop in eIF2 $\alpha$ . (A) Purified yeast eIF2 $\alpha^{3-175}$  was incubated for the indicated times with trypsin, chymotrypsin or thermolysin [1:1000 ratio (wt/wt)], as indicated. Protease reaction products were separated by SDS-PAGE and visualized by Coomassie Blue staining. The positions of intact eIF2 $\alpha^{3-175}$ , the eIF2 $\alpha$  C-terminal cleavage product (starting at Leu61), and the eIF2 $\alpha$  N-terminal cleavage product are indicated. (B) Purified yeast eIF2 $\alpha^{3-175}$  was incubated for 30 min with the indicated ratios (wt/wt) of trypsin or thermolysin. Protease reaction products were analyzed as described in A. (C) Purified yeast eIF2 $\alpha^{3-175}$  was incubated for 30 min with thermolysin [1:3500 ratio (wt/wt)], and the indicated ratio (wt/wt) of purified PKR kinase domain (KD). Protease reaction products were analyzed as described in A.
